# Supplementary material for: Molecular epidemiology and clinical characteristics of hepatitis D virus infection in Canada
Source: PubMed Central journal article supplement — JHEP Rep. 2022 Feb 22;4(5):100461. doi: 10.1016/j.jhepr.2022.100461 (PMC8961228; doi:10.1016/j.jhepr.2022.100461), 2022-02-22
Supplement: mmc2.pdf [file mmc2.pdf]

## Journal of Hepatology

### CTAT methods

Tables for a “Complete, Transparent, Accurate and Timely account” (CTAT) are now mandatory for all revised submissions. The aim is to enhance the reproducibility of methods.

- Only include the parts relevant to your study
- Refer to the CTAT in the main text as ‘Supplementary CTAT Table’
- Do not add subheadings
- Add as many rows as needed to include all information
- Only include one item per row

If the CTAT form is not relevant to your study, please outline the reasons why:

|  |
|--|
|  |
|--|

#### 1.1 Antibodies

| Name | Citation | Supplier | Cat no. | Clone no. |
|------|----------|----------|---------|-----------|
|      |          |          |         |           |

#### 1.2 Cell lines

| Name | Citation | Supplier | Cat no. | Passage no. | Authentication test method |
|------|----------|----------|---------|-------------|----------------------------|
|      |          |          |         |             |                            |

#### 1.3 Organisms

| Name | Citation | Supplier | Strain | Sex | Age | Overall n number |
|------|----------|----------|--------|-----|-----|------------------|
|      |          |          |        |     |     |                  |

#### 1.4 Sequence based reagents

| Name                                                           | Sequence | Supplier                                         |
|----------------------------------------------------------------|----------|--------------------------------------------------|
| AB 3730 XL DNA Analyzer using Big Dye 3.1 terminator chemistry | Sanger   | Thermo Fisher Scientific, Burlington, ON, Canada |

#### 1.5 Biological samples

| Description     | Source | Identifier |
|-----------------|--------|------------|
| Serum or plasma | human  |            |

#### 1.6 Deposited data

| Name of repository | Identifier                             | Link                                               |
|--------------------|----------------------------------------|----------------------------------------------------|
| GenBank            | Accession numbers<br>MZ712366-MZ712572 | Once processed by NCBI, the data will be available |

|  |  |                                                       |
|--|--|-------------------------------------------------------|
|  |  | at <a href="#">Home - Nucleotide - NCBI (nih.gov)</a> |
|--|--|-------------------------------------------------------|

## 1.7 Software

| Software name  | Manufacturer                                                                                                                | Version |
|----------------|-----------------------------------------------------------------------------------------------------------------------------|---------|
| MAFFT          | <a href="https://mafft.cbrc.jp/alignment/server/index.html">https://mafft.cbrc.jp/alignment/server/index.html</a>           | 7       |
| DIVEIN         | <a href="https://indra.mullins.microbiol.washington.edu/DIVEIN/">https://indra.mullins.microbiol.washington.edu/DIVEIN/</a> |         |
| GraphPad Prism | GraphPad Software                                                                                                           | 9.0.0   |

## 1.8 Other (e.g. drugs, proteins, vectors etc.)

|  |  |  |
|--|--|--|
|  |  |  |
|  |  |  |

## 1.9 Please provide the details of the corresponding methods author for the manuscript:

HDV antibody and RNA detection and sequencing: Carla Osiowy  
([Carla.osiowy@phac-aspc.gc.ca](mailto:Carla.osiowy@phac-aspc.gc.ca))  
Patient data collection and statistical analysis: Sarah Haylock-Jacobs  
([s.haylockjacobs@gmail.com](mailto:s.haylockjacobs@gmail.com))

## 2.0 Please confirm for randomised controlled trials all versions of the clinical protocol are included in the submission. These will be published online as supplementary information.

|  |
|--|
|  |
|--|
